# Supplementary material
Source: HighWire-hosted journal article supplement (https://erj.ersjournals.com/content/58/5/2100167)
Supplement: inline-supplementary-material-1 [file inline-supplementary-material-1.pdf]

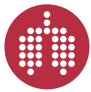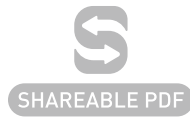

# Tests for tuberculosis infection: landscape analysis

Yohhei Hamada <sup>1</sup>, Daniela Maria Cirillo <sup>2</sup>, Alberto Matteelli<sup>3</sup>, Adam Penn-Nicholson<sup>4</sup>, Molebeng X. Rangaka<sup>1,5,6</sup> and Morten Ruhwald<sup>4,6</sup>

<sup>1</sup>Institute for Global Health, University College London, London, UK. <sup>2</sup>Emerging Bacterial Pathogens Unit, Division of Immunology, Transplantation and Infectious Diseases, IRCCS San Raffaele Scientific Institute, Milan, Italy. <sup>3</sup>Dept of Infectious and Tropical Diseases, Collaborating Centre for TB/HIV Co-infection and TB Elimination, University of Brescia, Brescia, Italy. <sup>4</sup>Foundation for Innovative New Diagnostics (FIND), Geneva, Switzerland. <sup>5</sup>Division of Epidemiology and Biostatistics, University of Cape Town, Cape Town, South Africa. <sup>6</sup>These authors contributed equally.

Corresponding author: Yohhei Hamada ([y.hamada@ucl.ac.uk](mailto:y.hamada@ucl.ac.uk))

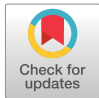

Shareable abstract (@ERSpublications)

**New and emerging tests for tuberculosis infection have the potential to improve accuracy, operational characteristics and end-user access. Evaluation of these tests in a standardised design would facilitate their endorsement and programmatic scale-up.** <https://bit.ly/327RBky>

**Cite this article as:** Hamada Y, Cirillo DM, Matteelli A, *et al.* Tests for tuberculosis infection: landscape analysis. *Eur Respir J* 2021; 58: 2100167 [DOI: 10.1183/13993003.00167-2021].

This single-page version can be shared freely online.

Copyright ©The authors 2021. For reproduction rights and permissions contact [permissions@ersnet.org](mailto:permissions@ersnet.org)

Received: 18 Jan 2021  
Accepted: 5 April 2021

## Abstract

**Background** Only the tuberculin skin test (TST) and two interferon- $\gamma$  release assays (IGRAs), QuantiFERON-TB Gold In-Tube and T-SPOT.TB, are currently endorsed by the World Health Organization as tests for tuberculosis (TB) infection. While IGRAs are more specific than the TST, they require sophisticated laboratory infrastructure and are costly to perform. However, both types of tests have limited performance to predict development of active TB. Tests with improved predictive performance and operational characteristics are needed.

**Methods** We reviewed the current landscape of tests for TB infection identified through a web-based survey targeting diagnostic manufacturers globally.

**Results** We identified 20 tests for TB infection: 15 *in vitro* tests and five skin tests. 13 of the *in vitro* tests are whole-blood IGRAs and 14 use early secreted antigenic target 6 (ESAT-6) and culture filtrate protein 10 (CFP-10), with or without additional antigens. 10 of the tests are based on assays other than an ELISA, such as a fluorescent lateral flow assay that requires less manual operation and shorter assay time and hence is more suitable for decentralisation compared with the existing IGRAs. Four of the five skin tests use ESAT-6 and CFP-10 proteins, while the remaining test uses a new antigen that is specific to *Mycobacterium tuberculosis* complex.

**Conclusions** New tests have the potential to improve accuracy, operational characteristics and end-user access to tests for TB infection. However, published data in various populations and settings are limited for most new tests. Evaluation of these new tests in a standardised design would facilitate their endorsement and programmatic scale-up.
